# Supplementary material
Source: MDPI journal article supplement (https://www.mdpi.com/2072-4292/12/7/1112)
Supplement: s1 [file s1]

# Time-Series Satellite Imagery Demonstrates the Progressive Failure of a City Master Plan to Control Urbanization in Abuja, Nigeria

## *Supplementary Information*

**Table S1**

Land cover class training and testing data for the 1975-2014 Landsat images of Abuja.

| Image date | No. class training samples (pixels) |             |               |        |           |       |
|------------|-------------------------------------|-------------|---------------|--------|-----------|-------|
|            | Bare exposed rock                   | Bare ground | Built-up land | Forest | Grassland | Water |
| 1975       | 35                                  | -           | 21            | 94     | 163       | -     |
| 1986       | 192                                 | 172         | 218           | 205    | 188       | 106   |
| 1990       | 92                                  | 268         | 202           | 314    | 546       | 182   |
| 1999       | 97                                  | 164         | 257           | 213    | 559       | 264   |
| 2002       | 153                                 | 137         | 196           | 147    | 210       | 112   |
| 2008       | 138                                 | 184         | 237           | 232    | 325       | 145   |
| 2014       | 99                                  | 171         | 225           | 144    | 553       | 358   |

**Table S2**

Error matrix for Abuja land cover classification using 1975 Landsat Multispectral Scanner image.

|                                                |                   | Reference class         |               |        |           | Users<br>accuracy (%) |
|------------------------------------------------|-------------------|-------------------------|---------------|--------|-----------|-----------------------|
|                                                |                   | Bare<br>exposed<br>rock | Built-up land | Forest | Grassland |                       |
| <b>Predicted<br/>class</b>                     | Bare exposed rock | 10                      | 0             | 5      | 5         | 50.0                  |
|                                                | Built-up land     | 0                       | 8             | 0      | 0         | 100.0                 |
|                                                | Forest            | 0                       | 0             | 18     | 1         | 90.0                  |
|                                                | Grassland         | 0                       | 12            | 2      | 18        | 56.3                  |
| <b>Producers accuracy (%)</b>                  |                   | 100.0                   | 40.0          | 72.0   | 75.0      |                       |
| <b>Overall classification accuracy = 67.5%</b> |                   |                         |               |        |           |                       |

**Table S3**

Error matrix for Abuja land cover classification using 1986 Landsat Thematic Mapper image.

|                                                |                   | Reference class         |             |                  |        |           |       | Users<br>accuracy (%) |
|------------------------------------------------|-------------------|-------------------------|-------------|------------------|--------|-----------|-------|-----------------------|
|                                                |                   | Bare<br>exposed<br>rock | Bare ground | Built-up<br>land | Forest | Grassland | Water |                       |
| <b>Predicted<br/>class</b>                     | Bare exposed rock | 40                      | 0           | 0                | 0      | 0         | 40    | 100.0                 |
|                                                | Bare ground       | 3                       | 27          | 8                | 0      | 2         | 0     | 67.5                  |
|                                                | Built-up land     | 0                       | 0           | 32               | 1      | 4         | 0     | 80.0                  |
|                                                | Forest            | 0                       | 0           | 0                | 40     | 0         | 0     | 100.0                 |
|                                                | Grassland         | 0                       | 0           | 0                | 0      | 39        | 0     | 97.5                  |
|                                                | Water             | 0                       | 0           | 0                | 0      | 0         | 0     | 100.0                 |
| <b>Producers accuracy (%)</b>                  |                   | 87.0                    | 100.0       | 80.0             | 95.2   | 86.7      | 100.0 |                       |
| <b>Overall classification accuracy = 90.8%</b> |                   |                         |             |                  |        |           |       |                       |

**Table S4**

Error matrix for Abuja land cover classification using 1990 Landsat Thematic Mapper image.

|                                                |                   | Reference class   |             |               |        |           |       | Users accuracy (%) |
|------------------------------------------------|-------------------|-------------------|-------------|---------------|--------|-----------|-------|--------------------|
|                                                |                   | Bare exposed rock | Bare ground | Built-up land | Forest | Grassland | Water |                    |
| <b>Predicted class</b>                         | Bare exposed rock | 37                | 0           | 0             | 2      | 1         | 0     | 92.5               |
|                                                | Bare ground       | 0                 | 36          | 2             | 0      | 2         | 0     | 90.0               |
|                                                | Built-up land     | 1                 | 2           | 23            | 0      | 14        | 0     | 57.5               |
|                                                | Forest            | 0                 | 0           | 0             | 33     | 7         | 0     | 82.5               |
|                                                | Grassland         | 2                 | 0           | 0             | 3      | 35        | 0     | 87.5               |
|                                                | Water             | 0                 | 0           | 1             | 0      | 0         | 39    | 97.5               |
| <b>Producers accuracy (%)</b>                  |                   | 92.5              | 94.7        | 88.5          | 86.8   | 59.3      | 100.0 |                    |
| <b>Overall classification accuracy = 84.6%</b> |                   |                   |             |               |        |           |       |                    |

**Table S5**

Error matrix for Abuja land cover classification using 1999 Landsat Thematic Mapper image.

|                                                |                   | Reference class         |             |                  |        |           |       | Users<br>accuracy (%) |
|------------------------------------------------|-------------------|-------------------------|-------------|------------------|--------|-----------|-------|-----------------------|
|                                                |                   | Bare<br>exposed<br>rock | Bare ground | Built-up<br>land | Forest | Grassland | Water |                       |
| <b>Predicted<br/>class</b>                     | Bare exposed rock | 38                      | 0           | 0                | 1      | 1         | 0     | 95.0                  |
|                                                | Bare ground       | 2                       | 24          | 10               | 0      | 4         | 0     | 60.0                  |
|                                                | Built-up land     | 0                       | 2           | 36               | 1      | 1         | 0     | 90.0                  |
|                                                | Forest            | 0                       | 0           | 0                | 40     | 0         | 0     | 100.0                 |
|                                                | Grassland         | 2                       | 0           | 0                | 5      | 33        | 0     | 82.5                  |
|                                                | Water             | 1                       | 0           | 1                | 1      | 0         | 37    | 92.5                  |
| <b>Producers accuracy (%)</b>                  |                   | 88.4                    | 92.3        | 76.6             | 83.3   | 84.6      | 100.0 |                       |
| <b>Overall classification accuracy = 86.7%</b> |                   |                         |             |                  |        |           |       |                       |

**Table S6**

Error matrix for Abuja land cover classification using 2002 Landsat Enhanced Thematic Mapper Plus image.

|                                                |                   | Reference class         |             |                  |        |           |       | Users<br>accuracy (%) |
|------------------------------------------------|-------------------|-------------------------|-------------|------------------|--------|-----------|-------|-----------------------|
|                                                |                   | Bare<br>exposed<br>rock | Bare ground | Built-up<br>land | Forest | Grassland | Water |                       |
| <b>Predicted<br/>class</b>                     | Bare exposed rock | 37                      | 0           | 0                | 0      | 2         | 1     | 92.5                  |
|                                                | Bare ground       | 0                       | 21          | 14               | 0      | 5         | 0     | 52.5                  |
|                                                | Built-up land     | 0                       | 0           | 37               | 0      | 3         | 0     | 92.5                  |
|                                                | Forest            | 0                       | 0           | 0                | 38     | 2         | 0     | 95.0                  |
|                                                | Grassland         | 2                       | 0           | 1                | 3      | 36        | 0     | 90.0                  |
|                                                | Water             | 1                       | 0           | 0                | 0      | 1         | 38    | 95.0                  |
| <b>Producers accuracy (%)</b>                  |                   | 93.4                    | 100.0       | 71.2             | 91.7   | 73.5      | 97.4  |                       |
| <b>Overall classification accuracy = 86.0%</b> |                   |                         |             |                  |        |           |       |                       |

**Table S7**

Error matrix for Abuja land cover classification using 2009 Landsat Enhanced Thematic Mapper Plus image.

|                                                |                   | Reference class         |             |                  |        |           |       | Users<br>accuracy (%) |
|------------------------------------------------|-------------------|-------------------------|-------------|------------------|--------|-----------|-------|-----------------------|
|                                                |                   | Bare<br>exposed<br>rock | Bare ground | Built-up<br>land | Forest | Grassland | Water |                       |
| <b>Predicted<br/>class</b>                     | Bare exposed rock | 33                      | 1           | 0                | 0      | 6         | 0     | 82.5                  |
|                                                | Bare ground       | 2                       | 17          | 14               | 0      | 7         | 0     | 42.5                  |
|                                                | Built-up land     | 1                       | 1           | 29               | 3      | 6         | 0     | 72.5                  |
|                                                | Forest            | 0                       | 0           | 0                | 39     | 1         | 0     | 97.5                  |
|                                                | Grassland         | 0                       | 0           | 1                | 4      | 35        | 0     | 87.5                  |
|                                                | Water             | 0                       | 0           | 0                | 4      | 0         | 36    | 90.0                  |
| <b>Producers accuracy (%)</b>                  |                   | 91.7                    | 89.5        | 65.9             | 78.0   | 63.6      | 100.0 |                       |
| <b>Overall classification accuracy = 78.8%</b> |                   |                         |             |                  |        |           |       |                       |

**Table S8**

Error matrix for Abuja land cover classification using 2014 Landsat Operational Land Imager image.

|                                                |                   | Reference class         |             |                  |        |           |       | Users<br>accuracy (%) |
|------------------------------------------------|-------------------|-------------------------|-------------|------------------|--------|-----------|-------|-----------------------|
|                                                |                   | Bare<br>exposed<br>rock | Bare ground | Built-up<br>land | Forest | Grassland | Water |                       |
| <b>Predicted<br/>class</b>                     | Bare exposed rock | 27                      | 0           | 0                | 0      | 0         | 0     | 100.0                 |
|                                                | Bare ground       | 0                       | 21          | 4                | 0      | 0         | 1     | 80.8                  |
|                                                | Built-up land     | 0                       | 1           | 36               | 0      | 1         | 2     | 90.0                  |
|                                                | Forest            | 0                       | 0           | 0                | 26     | 2         | 0     | 92.9                  |
|                                                | Grassland         | 10                      | 6           | 3                | 9      | 53        | 0     | 65.4                  |
|                                                | Water             | 0                       | 0           | 0                | 0      | 0         | 38    | 100.0                 |
| <b>Producers accuracy (%)</b>                  |                   | 92.7                    | 75.0        | 83.7             | 74.3   | 94.6      | 92.7  |                       |
| <b>Overall classification accuracy = 83.8%</b> |                   |                         |             |                  |        |           |       |                       |
